# Supplementary material
Source: JCI journal article supplement (doi:10.1172/jci154719)
Supplement: sd2 [file 2]

CellProfiler Pipeline: <http://www.cellprofiler.org>

Version:3

DateRevision:20140723174500

GitHash:6c2d896

ModuleCount:14

HasImagePlaneDetails:False

```
LoadImages:[module_num:1|svn_version:\'Unknown\'|
variable_revision_number:11|show_window:False|notes:\x5B\x5D|
batch_state:array(\x5B\x5D, dtype=uint8)|enabled:True|
wants_pause:False]
  File type to be loaded:individual images
  File selection method:Text-Exact match
  Number of images in each group?:3
  Type the text that the excluded images have in common:Do not use
  Analyze all subfolders within the selected folder?:None
  Input image file location:Default Input Folder\x7C
  Check image sets for unmatched or duplicate files?:Yes
  Group images by metadata?:Yes
  Exclude certain files?:No
  Specify metadata fields to group by:Plate
  Select subfolders to analyze:
  Image count:2
  Text that these images have in common (case-
sensitive):ChNm_DAPIextended
  Position of this image in each group:1
  Extract metadata from where?:File name
  Regular expression that finds metadata in the file name:Batch_(?
P<Batch>\x5B0-9\x5D+)-Plate_(?P<Plate>.*)-Well_(?P<Well>\x5BA-
P\x5D\x5B0-9\x5D{2})-SX_(?P<SiteX>\x5B0-9\x5D)-SY_(?
P<SiteY>\x5B0-9\x5D)-.*-Class_(?P<Class>.*).\x5BA-Za-z0-9\x5D{3}
  Type the regular expression that finds metadata in the subfolder
path:.*\x5B\\\\\\\\\\\\\x5D(?P<Date>.*)\x5B\\\\\\\\\\\\\x5D(?P<Run>.*)$
  Channel count:1
  Group the movie frames?:No
  Grouping method:Interleaved
  Number of channels per group:3
  Load the input as images or objects?:Images
  Name this loaded image:DAPI
  Name this loaded object:Nuclei
  Retain outlines of loaded objects?:No
  Name the outline image:LoadedImageOutlines
  Channel number:1
  Rescale intensities?:No
  Text that these images have in common (case-
sensitive):ChNm_Alexa488
  Position of this image in each group:2
  Extract metadata from where?:File name
  Regular expression that finds metadata in the file name:Batch_(?
P<Batch>\x5B0-9\x5D+)-Plate_(?P<Plate>.*)-Well_(?P<Well>\x5BA-
```



Name the output image: IllumAct  
Select how the illumination function is calculated: Background  
Dilate objects in the final averaged image?: No  
Dilation radius: 1  
Block size: 80  
Rescale the illumination function?: No  
Calculate function for each image individually, or based on all  
images?: Each  
Smoothing method: Fit Polynomial  
Method to calculate smoothing filter size: Automatic  
Approximate object size: 10  
Smoothing filter size: 10  
Retain the averaged image?: No  
Name the averaged image: IllumBlueAvg  
Retain the dilated image?: No  
Name the dilated image: IllumBlueDilated  
Automatically calculate spline parameters?: Yes  
Background mode: auto  
Number of spline points: 5  
Background threshold: 2  
Image resampling factor: 2  
Maximum number of iterations: 40  
Residual value for convergence: 0.001

CorrectIlluminationApply: [module\_num: 4 | svn\_version: 'Unknown' |  
variable\_revision\_number: 3 | show\_window: False | notes: \x5B\x5D |  
batch\_state: array(\x5B\x5D, dtype=uint8) | enabled: True |  
wants\_pause: False]

Select the input image: DAPI  
Name the output image: CorrDAPI  
Select the illumination function: IllumDAPI  
Select how the illumination function is applied: Subtract  
Select the input image: ACT  
Name the output image: CorrACT  
Select the illumination function: IllumAct  
Select how the illumination function is applied: Subtract

MeasureImageQuality: [module\_num: 5 | svn\_version: 'Unknown' |  
variable\_revision\_number: 5 | show\_window: False | notes: \x5B\x5D |  
batch\_state: array(\x5B\x5D, dtype=uint8) | enabled: True |  
wants\_pause: False]

Calculate metrics for which images?: Select...  
Image count: 1  
Scale count: 1  
Threshold count: 1  
Select the images to measure: DAPI  
Include the image rescaling value?: Yes  
Calculate blur metrics?: Yes  
Spatial scale for blur measurements: 20  
Calculate saturation metrics?: Yes

Calculate intensity metrics?:No  
Calculate thresholds?:No  
Use all thresholding methods?:No  
Select a thresholding method:Otsu  
Typical fraction of the image covered by objects:0.1  
Two-class or three-class thresholding?:Two classes  
Minimize the weighted variance or the entropy?:Weighted variance  
Assign pixels in the middle intensity class to the foreground or  
the background?:Foreground

IdentifyPrimaryObjects:[module\_num:6|svn\_version:\'Unknown\'|  
variable\_revision\_number:10|show\_window:False|notes:\x5B\x5D|  
batch\_state:array(\x5B\x5D, dtype=uint8)|enabled:True|  
wants\_pause:False]  
Select the input image:CorrDAPI  
Name the primary objects to be identified:Nuclei  
Typical diameter of objects, in pixel units (Min,Max):10,200  
Discard objects outside the diameter range?:Yes  
Try to merge too small objects with nearby larger objects?:No  
Discard objects touching the border of the image?:Yes  
Method to distinguish clumped objects:Intensity  
Method to draw dividing lines between clumped objects:Intensity  
Size of smoothing filter:10  
Suppress local maxima that are closer than this minimum allowed  
distance:7  
Speed up by using lower-resolution image to find local maxima?:No  
Name the outline image:PrimaryOutlines  
Fill holes in identified objects?:After both thresholding and  
declumping  
Automatically calculate size of smoothing filter for  
declumping?:Yes  
Automatically calculate minimum allowed distance between local  
maxima?:Yes  
Retain outlines of the identified objects?:No  
Automatically calculate the threshold using the Otsu method?:Yes  
Enter Laplacian of Gaussian threshold:0.5  
Automatically calculate the size of objects for the Laplacian of  
Gaussian filter?:Yes  
Enter LoG filter diameter:5  
Handling of objects if excessive number of objects  
identified:Continue  
Maximum number of objects:2000  
Threshold setting version:1  
Threshold strategy:Global  
Thresholding method:Otsu  
Select the smoothing method for thresholding:Automatic  
Threshold smoothing scale:1  
Threshold correction factor:0.5  
Lower and upper bounds on threshold:0.05,0.1  
Approximate fraction of image covered by objects?:0.01

Manual threshold:0.0  
Select the measurement to threshold with:None  
Select binary image:None  
Masking objects:From image  
Two-class or three-class thresholding?:Two classes  
Minimize the weighted variance or the entropy?:Weighted variance  
Assign pixels in the middle intensity class to the foreground or  
the background?:Foreground  
Method to calculate adaptive window size:Image size  
Size of adaptive window:10

IdentifySecondaryObjects:[module\_num:7|svn\_version:\'Unknown\'|  
variable\_revision\_number:9|show\_window:False|notes:\x5B\x5D|  
batch\_state:array(\x5B\x5D, dtype=uint8)|enabled:True|  
wants\_pause:True]  
Select the input objects:Nuclei  
Name the objects to be identified:ACTobj  
Select the method to identify the secondary objects:Propagation  
Select the input image:CorrACT  
Number of pixels by which to expand the primary objects:10  
Regularization factor:0.05  
Name the outline image:SecondaryOutlines  
Retain outlines of the identified secondary objects?:No  
Discard secondary objects touching the border of the image?:No  
Discard the associated primary objects?:No  
Name the new primary objects:FilteredNuclei  
Retain outlines of the new primary objects?:No  
Name the new primary object outlines:FilteredNucleiOutlines  
Fill holes in identified objects?:Yes  
Threshold setting version:1  
Threshold strategy:Global  
Thresholding method:RobustBackground  
Select the smoothing method for thresholding:No smoothing  
Threshold smoothing scale:1  
Threshold correction factor:1  
Lower and upper bounds on threshold:0.01,1  
Approximate fraction of image covered by objects?:0.01  
Manual threshold:0.0  
Select the measurement to threshold with:None  
Select binary image:None  
Masking objects:From image  
Two-class or three-class thresholding?:Two classes  
Minimize the weighted variance or the entropy?:Weighted variance  
Assign pixels in the middle intensity class to the foreground or  
the background?:Foreground  
Method to calculate adaptive window size:Image size  
Size of adaptive window:10

MeasureObjectSizeShape:[module\_num:8|svn\_version:\'Unknown\'|  
variable\_revision\_number:1|show\_window:False|notes:\x5B\x5D|

batch\_state:array(\x5B\x5D, dtype=uint8)|enabled:True|  
wants\_pause:True]  
    Select objects to measure:Nuclei  
    Select objects to measure:ACTobj  
    Calculate the Zernike features?:Yes

MeasureTexture:[module\_num:9|svn\_version:\'Unknown\'|  
variable\_revision\_number:3|show\_window:False|notes:\x5B\x5D|  
batch\_state:array(\x5B\x5D, dtype=uint8)|enabled:True|  
wants\_pause:False]  
    Hidden:2  
    Hidden:2  
    Hidden:1  
    Select an image to measure:IllumAct  
    Select an image to measure:CorrACT  
    Select objects to measure:Nuclei  
    Select objects to measure:ACTobj  
    Texture scale to measure:3  
    Angles to measure:Horizontal  
    Measure Gabor features?:Yes  
    Number of angles to compute for Gabor:4

MeasureGranularity:[module\_num:10|svn\_version:\'Unknown\'|  
variable\_revision\_number:3|show\_window:False|notes:\x5B\x5D|  
batch\_state:array(\x5B\x5D, dtype=uint8)|enabled:True|  
wants\_pause:False]  
    Image count:1  
    Object count:1  
    Select an image to measure:CorrACT  
    Subsampling factor for granularity measurements:0.25  
    Subsampling factor for background reduction:0.25  
    Radius of structuring element:10  
    Range of the granular spectrum:16  
    Select objects to measure:ACTobj

MeasureObjectIntensity:[module\_num:11|svn\_version:\'Unknown\'|  
variable\_revision\_number:3|show\_window:False|notes:\x5B\x5D|  
batch\_state:array(\x5B\x5D, dtype=uint8)|enabled:True|  
wants\_pause:False]  
    Hidden:1  
    Select an image to measure:CorrACT  
    Select objects to measure:ACTobj

MeasureObjectNeighbors:[module\_num:12|svn\_version:\'Unknown\'|  
variable\_revision\_number:2|show\_window:False|notes:\x5B\x5D|  
batch\_state:array(\x5B\x5D, dtype=uint8)|enabled:True|  
wants\_pause:False]  
    Select objects to measure:Nuclei  
    Select neighboring objects to measure:Nuclei  
    Method to determine neighbors:Expand until adjacent

Neighbor distance:5  
Retain the image of objects colored by numbers of neighbors?:No  
Name the output image:ObjectNeighborCount  
Select colormap:Default  
Retain the image of objects colored by percent of touching  
pixels?:No  
Name the output image:PercentTouching  
Select a colormap:Default

MeasureObjectRadialDistribution:[module\_num:13|svn\_version:  
'Unknown'|variable\_revision\_number:3|show\_window:False|notes:  
\x5B\x5D|batch\_state:array(\x5B\x5D, dtype=uint8)|enabled:True|  
wants\_pause:False]  
Hidden:1  
Hidden:1  
Hidden:1  
Select an image to measure:CorrACT  
Select objects to measure:ACTobj  
Object to use as center?:Centers of other objects  
Select objects to use as centers:Nuclei  
Scale the bins?:Yes  
Number of bins:4  
Maximum radius:100

ExportToSpreadsheet:[module\_num:14|svn\_version:'Unknown'|  
variable\_revision\_number:11|show\_window:False|notes:\x5B\x5D|  
batch\_state:array(\x5B\x5D, dtype=uint8)|enabled:True|  
wants\_pause:False]  
Select the column delimiter:Comma (",")  
Add image metadata columns to your object data file?:Yes  
Limit output to a size that is allowed in Excel?:No  
Select the measurements to export:Yes  
Calculate the per-image mean values for object measurements?:Yes  
Calculate the per-image median values for object measurements?:No  
Calculate the per-image standard deviation values for object  
measurements?:No  
Output file location:Default Output Folder\x7CNone  
Create a GenePattern GCT file?:No  
Select source of sample row name:Metadata  
Select the image to use as the identifier:None  
Select the metadata to use as the identifier:None  
Export all measurement types?:Yes  
Press button to select measurements to  
export:Image\x7CCount\_Nuclei,Image\x7CCount\_ACTobj,Image\x7CImageQuali  
ty\_LocalFocusScore\_DAPI\_20,Image\x7CImageQuality\_PercentMaximal\_DAPI,I  
mage\x7CImageQuality\_PowerLogLogSlope\_DAPI,Image\x7CImageQuality\_Scali  
ng\_DAPI,Image\x7CImageQuality\_PercentMinimal\_DAPI,Image\x7CImageQualit  
y\_FocusScore\_DAPI,Image\x7CImageQuality\_Correlation\_DAPI\_20,Image\x7CW  
idth\_DAPI,Image\x7CWidth\_ACT,Image\x7CFileName\_DAPI,Image\x7CFileName\_  
ACT,Image\x7CURL\_DAPI,Image\x7CURL\_ACT,Image\x7CTexture\_DifferenceEntr

opy\_CorrACT\_3\_0,Image\x7CTexture\_InfoMeas2\_CorrACT\_3\_0,Image\x7CTexture\_InfoMeas1\_CorrACT\_3\_0,Image\x7CTexture\_SumVariance\_CorrACT\_3\_0,Image\x7CTexture\_Gabor\_CorrACT\_3,Image\x7CTexture\_AngularSecondMoment\_CorrACT\_3\_0,Image\x7CTexture\_DifferenceVariance\_CorrACT\_3\_0,Image\x7CTexture\_Entropy\_CorrACT\_3\_0,Image\x7CTexture\_Correlation\_CorrACT\_3\_0,Image\x7CTexture\_SumAverage\_CorrACT\_3\_0,Image\x7CTexture\_Variance\_CorrACT\_3\_0,Image\x7CTexture\_SumEntropy\_CorrACT\_3\_0,Image\x7CTexture\_InverseDifferenceMoment\_CorrACT\_3\_0,Image\x7CTexture\_Contrast\_CorrACT\_3\_0,Image\x7CHeight\_DAPI,Image\x7CHeight\_ACT,Image\x7CScaling\_DAPI,Image\x7CScaling\_ACT,Image\x7CPathName\_DAPI,Image\x7CPathName\_ACT,Image\x7CGranularity\_11\_CorrACT,Image\x7CGranularity\_10\_CorrACT,Image\x7CGranularity\_13\_CorrACT,Image\x7CGranularity\_12\_CorrACT,Image\x7CGranularity\_14\_CorrACT,Image\x7CGranularity\_16\_CorrACT,Image\x7CGranularity\_1\_CorrACT,Image\x7CGranularity\_3\_CorrACT,Image\x7CGranularity\_2\_CorrACT,Image\x7CGranularity\_5\_CorrACT,Image\x7CGranularity\_8\_CorrACT,Image\x7CGranularity\_7\_CorrACT,Image\x7CGranularity\_6\_CorrACT,Image\x7CGranularity\_9\_CorrACT,Image\x7CGranularity\_15\_CorrACT,Image\x7CGranularity\_4\_CorrACT,Image\x7CThreshold\_OrigThreshold\_Nuclei,Image\x7CThreshold\_OrigThreshold\_ACTobj,Image\x7CThreshold\_SumOfEntropies\_Nuclei,Image\x7CThreshold\_SumOfEntropies\_ACTobj,Image\x7CThreshold\_WeightedVariance\_Nuclei,Image\x7CThreshold\_WeightedVariance\_ACTobj,Image\x7CThreshold\_FinalThreshold\_Nuclei,Image\x7CThreshold\_FinalThreshold\_ACTobj,Image\x7CGroup\_Index,Image\x7CGroup\_Number,Image\x7CMD5Digest\_DAPI,Image\x7CMD5Digest\_ACT,Image\x7CMetadata\_Plate,Image\x7CMetadata\_SiteX,Image\x7CMetadata\_SiteY,Image\x7CMetadata\_Well,Image\x7CMetadata\_Batch,Image\x7CMetadata\_Class,Nuclei\x7CNeighbors\_SecondClosestDistance\_Expanded,Nuclei\x7CNeighbors\_FirstClosestDistance\_Expanded,Nuclei\x7CNeighbors\_FirstClosestObjectNumber\_Expanded,Nuclei\x7CNeighbors\_SecondClosestObjectNumber\_Expanded,Nuclei\x7CNeighbors\_PercentTouching\_Expanded,Nuclei\x7CNeighbors\_NumberOfNeighbors\_Expanded,Nuclei\x7CNeighbors\_AngleBetweenNeighbors\_Expanded,Nuclei\x7CNumber\_Object\_Number,Nuclei\x7CTexture\_DifferenceVariance\_CorrACT\_3\_0,Nuclei\x7CTexture\_InfoMeas1\_CorrACT\_3\_0,Nuclei\x7CTexture\_SumVariance\_CorrACT\_3\_0,Nuclei\x7CTexture\_Gabor\_CorrACT\_3,Nuclei\x7CTexture\_AngularSecondMoment\_CorrACT\_3\_0,Nuclei\x7CTexture\_Correlation\_CorrACT\_3\_0,Nuclei\x7CTexture\_Entropy\_CorrACT\_3\_0,Nuclei\x7CTexture\_DifferenceEntropy\_CorrACT\_3\_0,Nuclei\x7CTexture\_SumAverage\_CorrACT\_3\_0,Nuclei\x7CTexture\_Variance\_CorrACT\_3\_0,Nuclei\x7CTexture\_InverseDifferenceMoment\_CorrACT\_3\_0,Nuclei\x7CTexture\_SumEntropy\_CorrACT\_3\_0,Nuclei\x7CTexture\_Contrast\_CorrACT\_3\_0,Nuclei\x7CTexture\_InfoMeas2\_CorrACT\_3\_0,Nuclei\x7CLocation\_Center\_Y,Nuclei\x7CLocation\_Center\_X,Nuclei\x7CAreaShape\_Perimeter,Nuclei\x7CAreaShape\_FormFactor,Nuclei\x7CAreaShape\_Solidity,Nuclei\x7CAreaShape\_Center\_Y,Nuclei\x7CAreaShape\_Center\_X,Nuclei\x7CAreaShape\_MaxFerretDiameter,Nuclei\x7CAreaShape\_MinFerretDiameter,Nuclei\x7CAreaShape\_Area,Nuclei\x7CAreaShape\_EulerNumber,Nuclei\x7CAreaShape\_Zernike\_1\_1,Nuclei\x7CAreaShape\_Zernike\_0\_0,Nuclei\x7CAreaShape\_Zernike\_3\_1,Nuclei\x7CAreaShape\_Zernike\_3\_3,Nuclei\x7CAreaShape\_Zernike\_2\_0,Nuclei\x7CAreaShape\_Zernike\_2\_2,Nuclei\x7CAreaShape\_Zernike\_5\_1,Nuclei\x7CAreaShape\_Zernike\_5\_3,Nuclei\x7CAreaShape\_Zernike\_5\_5,Nuclei\x7CAreaShape\_Zernike\_4\_0,Nuclei\x7CAreaShape\_Zernike\_4\_2,Nuclei\x7CAreaShape\_Zernike\_4\_4,Nuclei\x7CAreaShape\_Zernike\_7\_1,Nuclei\x7CAreaShape\_Z

ernike\_7\_3,Nuclei\x7CAreaShape\_Zernike\_7\_5,Nuclei\x7CAreaShape\_Zernike\_7\_7,Nuclei\x7CAreaShape\_Zernike\_6\_0,Nuclei\x7CAreaShape\_Zernike\_6\_2,Nuclei\x7CAreaShape\_Zernike\_6\_4,Nuclei\x7CAreaShape\_Zernike\_6\_6,Nuclei\x7CAreaShape\_Zernike\_9\_1,Nuclei\x7CAreaShape\_Zernike\_9\_3,Nuclei\x7CAreaShape\_Zernike\_9\_5,Nuclei\x7CAreaShape\_Zernike\_9\_7,Nuclei\x7CAreaShape\_Zernike\_9\_9,Nuclei\x7CAreaShape\_Zernike\_8\_0,Nuclei\x7CAreaShape\_Zernike\_8\_2,Nuclei\x7CAreaShape\_Zernike\_8\_4,Nuclei\x7CAreaShape\_Zernike\_8\_6,Nuclei\x7CAreaShape\_Zernike\_8\_8,Nuclei\x7CAreaShape\_Eccentricity,Nuclei\x7CAreaShape\_Compactness,Nuclei\x7CAreaShape\_Extent,Nuclei\x7CAreaShape\_Orientation,Nuclei\x7CAreaShape\_MedianRadius,Nuclei\x7CAreaShape\_MaximumRadius,Nuclei\x7CAreaShape\_MinorAxisLength,Nuclei\x7CAreaShape\_MajorAxisLength,Nuclei\x7CAreaShape\_MeanRadius,Nuclei\x7CChildren\_ACTobj\_Count,ACTobj\x7CParent\_Nuclei,ACTobj\x7CGranularity\_11\_CorrACT,ACTobj\x7CGranularity\_10\_CorrACT,ACTobj\x7CGranularity\_13\_CorrACT,ACTobj\x7CGranularity\_12\_CorrACT,ACTobj\x7CGranularity\_15\_CorrACT,ACTobj\x7CGranularity\_14\_CorrACT,ACTobj\x7CGranularity\_16\_CorrACT,ACTobj\x7CGranularity\_1\_CorrACT,ACTobj\x7CGranularity\_3\_CorrACT,ACTobj\x7CGranularity\_2\_CorrACT,ACTobj\x7CGranularity\_5\_CorrACT,ACTobj\x7CGranularity\_4\_CorrACT,ACTobj\x7CGranularity\_7\_CorrACT,ACTobj\x7CGranularity\_6\_CorrACT,ACTobj\x7CGranularity\_9\_CorrACT,ACTobj\x7CGranularity\_8\_CorrACT,ACTobj\x7CNumber\_Object\_Number,ACTobj\x7CTexture\_InfoMeas2\_CorrACT\_3\_0,ACTobj\x7CTexture\_InfoMeas1\_CorrACT\_3\_0,ACTobj\x7CTexture\_SumVariance\_CorrACT\_3\_0,ACTobj\x7CTexture\_Gabor\_CorrACT\_3,ACTobj\x7CTexture\_DifferenceEntropy\_CorrACT\_3\_0,ACTobj\x7CTexture\_Correlation\_CorrACT\_3\_0,ACTobj\x7CTexture\_SumAverage\_CorrACT\_3\_0,ACTobj\x7CTexture\_Entropy\_CorrACT\_3\_0,ACTobj\x7CTexture\_AngularSecondMoment\_CorrACT\_3\_0,ACTobj\x7CTexture\_DifferenceVariance\_CorrACT\_3\_0,ACTobj\x7CTexture\_Variance\_CorrACT\_3\_0,ACTobj\x7CTexture\_SumEntropy\_CorrACT\_3\_0,ACTobj\x7CTexture\_InverseDifferenceMoment\_CorrACT\_3\_0,ACTobj\x7CTexture\_Contrast\_CorrACT\_3\_0,ACTobj\x7CIntensity\_MassDisplacement\_CorrACT,ACTobj\x7CIntensity\_MinIntensity\_CorrACT,ACTobj\x7CIntensity\_StdIntensity\_CorrACT,ACTobj\x7CIntensity\_IntegratedIntensityEdge\_CorrACT,ACTobj\x7CIntensity\_UpperQuartileIntensity\_CorrACT,ACTobj\x7CIntensity\_LowerQuartileIntensity\_CorrACT,ACTobj\x7CIntensity\_MinIntensityEdge\_CorrACT,ACTobj\x7CIntensity\_MADIntensity\_CorrACT,ACTobj\x7CIntensity\_IntegratedIntensity\_CorrACT,ACTobj\x7CIntensity\_MeanIntensityEdge\_CorrACT,ACTobj\x7CIntensity\_MaxIntensity\_CorrACT,ACTobj\x7CIntensity\_MedianIntensity\_CorrACT,ACTobj\x7CIntensity\_MeanIntensity\_CorrACT,ACTobj\x7CIntensity\_StdIntensityEdge\_CorrACT,ACTobj\x7CIntensity\_MaxIntensityEdge\_CorrACT,ACTobj\x7CLocation\_MaxIntensity\_Y\_CorrACT,ACTobj\x7CLocation\_MaxIntensity\_X\_CorrACT,ACTobj\x7CLocation\_Center\_Y\_CorrACT,ACTobj\x7CLocation\_Center\_X,ACTobj\x7CLocation\_CenterMassIntensity\_Y\_CorrACT,ACTobj\x7CLocation\_CenterMassIntensity\_X\_CorrACT,ACTobj\x7CAreaShape\_Perimeter,ACTobj\x7CAreaShape\_FormFactor,ACTobj\x7CAreaShape\_MeanRadius,ACTobj\x7CAreaShape\_Orientation,ACTobj\x7CAreaShape\_Area,ACTobj\x7CAreaShape\_MinFerretDiameter,ACTobj\x7CAreaShape\_Solidity,ACTobj\x7CAreaShape\_MaxFerretDiameter,ACTobj\x7CAreaShape\_EulerNumber,ACTobj\x7CAreaShape\_Zernike\_1\_1,ACTobj\x7CAreaShape\_Zernike\_0\_0,ACTobj\x7CAreaShape\_Zernike\_3\_1,ACTobj\x7CAreaShape\_Zernike\_3\_3,ACTobj\x7CAreaShape\_Zernike\_2\_0,ACTobj\x7CAreaShape\_Zernike\_2\_2,ACTobj\x7CAreaShape\_Zernike\_5\_1,ACTobj\x7CAreaShape\_Zernike\_5\_5,ACTobj\x7CAreaShape\_Zern

ike\_5\_3,ACTobj\x7CAreaShape\_Zernike\_4\_0,ACTobj\x7CAreaShape\_Zernike\_4\_2,ACTobj\x7CAreaShape\_Zernike\_4\_4,ACTobj\x7CAreaShape\_Zernike\_7\_1,ACTobj\x7CAreaShape\_Zernike\_7\_5,ACTobj\x7CAreaShape\_Zernike\_7\_3,ACTobj\x7CAreaShape\_Zernike\_7\_7,ACTobj\x7CAreaShape\_Zernike\_6\_0,ACTobj\x7CAreaShape\_Zernike\_6\_2,ACTobj\x7CAreaShape\_Zernike\_6\_4,ACTobj\x7CAreaShape\_Zernike\_6\_6,ACTobj\x7CAreaShape\_Zernike\_9\_1,ACTobj\x7CAreaShape\_Zernike\_9\_3,ACTobj\x7CAreaShape\_Zernike\_9\_5,ACTobj\x7CAreaShape\_Zernike\_9\_7,ACTobj\x7CAreaShape\_Zernike\_9\_9,ACTobj\x7CAreaShape\_Zernike\_8\_0,ACTobj\x7CAreaShape\_Zernike\_8\_2,ACTobj\x7CAreaShape\_Zernike\_8\_4,ACTobj\x7CAreaShape\_Zernike\_8\_6,ACTobj\x7CAreaShape\_Zernike\_8\_8,ACTobj\x7CAreaShape\_MedianRadius,ACTobj\x7CAreaShape\_Compactness,ACTobj\x7CAreaShape\_Extent,ACTobj\x7CAreaShape\_Eccentricity,ACTobj\x7CAreaShape\_MaximumRadius,ACTobj\x7CAreaShape\_MinorAxisLength,ACTobj\x7CAreaShape\_MajorAxisLength,ACTobj\x7CAreaShape\_Center\_Y,ACTobj\x7CAreaShape\_Center\_X,ACTobj\x7CRadialDistribution\_RadialCV\_CorrACT\_3of4,ACTobj\x7CRadialDistribution\_RadialCV\_CorrACT\_4of4,ACTobj\x7CRadialDistribution\_RadialCV\_CorrACT\_1of4,ACTobj\x7CRadialDistribution\_RadialCV\_CorrACT\_2of4,ACTobj\x7CRadialDistribution\_FracAtD\_CorrACT\_3of4,ACTobj\x7CRadialDistribution\_FracAtD\_CorrACT\_4of4,ACTobj\x7CRadialDistribution\_FracAtD\_CorrACT\_1of4,ACTobj\x7CRadialDistribution\_FracAtD\_CorrACT\_2of4,ACTobj\x7CRadialDistribution\_MeanFrac\_CorrACT\_3of4,ACTobj\x7CRadialDistribution\_MeanFrac\_CorrACT\_4of4,ACTobj\x7CRadialDistribution\_MeanFrac\_CorrACT\_1of4,ACTobj\x7CRadialDistribution\_MeanFrac\_CorrACT\_2of4

Representation of Nan/Inf:NaN

Add a prefix to file names?:No

Filename prefix\x3A:MyExpt\_

Overwrite without warning?:Yes

Data to export:Do not use

Combine these object measurements with those of the previous object?:No

File name:DATA.csv

Use the object name for the file name?:Yes
